# Supplementary material for: Halogen⋯oxygen aggregation and disorder modes in pressure frozen XCF2CF2X : 1,4-dioxane (X = Br,I) complexes
Source: Royal Society of Chemistry journal article supplement (doi:10.1039/b822832a), 2009-01-01
Supplement: b822832a.pdf [file b822832a.pdf]

## Supplementary Information: Halogen···oxygen aggregation and disorder modes in pressure frozen XCF<sub>2</sub>CF<sub>2</sub>X:1,4-dioxane (X=Br,I) complexes

Anna Olejniczak<sup>a</sup>, Andrzej Katrusiak<sup>a\*</sup> and Ashwani Vij<sup>b</sup>

<sup>a</sup>Faculty of Chemistry, Adam Mickiewicz University, Grunwaldzka 6, 60-780 Poznań, Poland.

E-mail: katran@amu.edu.pl

<sup>b</sup>AFRL/RZSP, Edwards Air Force Base, 10 E. Saturn Blvd, Bldg. 8451. CA, 93524, USA.

E-mail: ashwani.vij@edwards.af.mil

**Table S1.** Selected crystal data and details of structure refinement for the ICF<sub>2</sub>CF<sub>2</sub>I:C<sub>4</sub>H<sub>8</sub>O<sub>2</sub> and BrCF<sub>2</sub>CF<sub>2</sub>I:C<sub>4</sub>H<sub>8</sub>O<sub>2</sub> cocrystals, and for C<sub>4</sub>H<sub>8</sub>O<sub>2</sub>.

| Compound                                                   | ICF <sub>2</sub> CF <sub>2</sub> I:C <sub>4</sub> H <sub>8</sub> O <sub>2</sub>         | BrCF <sub>2</sub> CF <sub>2</sub> I:C <sub>4</sub> H <sub>8</sub> O <sub>2</sub>                                               | C <sub>4</sub> H <sub>8</sub> O <sub>2</sub>                                                                                   |
|------------------------------------------------------------|-----------------------------------------------------------------------------------------|--------------------------------------------------------------------------------------------------------------------------------|--------------------------------------------------------------------------------------------------------------------------------|
| Pressure (GPa)                                             | 0.30(5)                                                                                 | 0.62(5)                                                                                                                        | 0.42(5)                                                                                                                        |
| Temperature (K)                                            | 296(2)                                                                                  | 296(2)                                                                                                                         | 296(2)                                                                                                                         |
| Formula weight                                             | 441.92                                                                                  | 394.93                                                                                                                         | 88.10                                                                                                                          |
| Wavelength (Å)                                             | 0.71073                                                                                 | 0.71073                                                                                                                        | 0.71073                                                                                                                        |
| Crystal system                                             | Trigonal                                                                                | Monoclinic                                                                                                                     | Monoclinic                                                                                                                     |
| Space group                                                | R $\bar{3}$                                                                             | P2 <sub>1</sub> /c                                                                                                             | P2 <sub>1</sub> /n                                                                                                             |
| Unit cell dimensions (Å, °)                                | a 8.838(1)<br>b 8.838(1)<br>c 13.532(3)<br>β                                            | 9.5983(19)<br>5.9716(12)<br>9.784(2)<br>107.41(3)                                                                              | 5.6590(10)<br>6.4100(10)<br>5.8920(10)<br>98.36(3)                                                                             |
| Volume (Å <sup>3</sup> )                                   | 915.4(3)                                                                                | 535.13(19)                                                                                                                     | 211.46(6)                                                                                                                      |
| Z                                                          | 3                                                                                       | 2                                                                                                                              | 2                                                                                                                              |
| Calculated density (g/cm <sup>3</sup> )                    | 2.405                                                                                   | 2.451                                                                                                                          | 1.384                                                                                                                          |
| Absorption coefficient (mm <sup>-1</sup> )                 | 5.180                                                                                   | 6.755                                                                                                                          | 0.110                                                                                                                          |
| F(000)                                                     | 606                                                                                     | 368                                                                                                                            | 96                                                                                                                             |
| Crystal size (mm)                                          | 0.43/0.43/0.09                                                                          | 0.47/0.47/0.08                                                                                                                 | 0.30/0.30/0.09                                                                                                                 |
| θ-range for data collection (°)                            | 3.06 to 29.53                                                                           | 4.05 to 29.31                                                                                                                  | 4.83 to 29.59                                                                                                                  |
| Min/max indices: h, k, l                                   | -11/12, -11/12, -8/8                                                                    | -5/5, -8/8, -13/13                                                                                                             | -6/6, -8/8, -4/4                                                                                                               |
| Reflect. coll./ unique (Rint)                              | 1688/237<br>(0.1380)                                                                    | 3961/455<br>(0.0663)                                                                                                           | 1696/180<br>(0.1265)                                                                                                           |
| Completeness (to θmax) (% , °)                             | 40.7<br>(to 29.53)                                                                      | 31.0<br>(to 29.31)                                                                                                             | 30.4<br>(to 29.59)                                                                                                             |
| Refinement method                                          | Full-matrix least-squares on F <sup>2</sup>                                             |                                                                                                                                |                                                                                                                                |
| Data/restraints/ parameters                                | 237/0/39                                                                                | 455/0/64                                                                                                                       | 180/0/29                                                                                                                       |
| Goodness-of-fit on F <sup>2</sup>                          | 1.440                                                                                   | 1.196                                                                                                                          | 1.416                                                                                                                          |
| Final R <sub>1</sub> /wR <sub>2</sub> (I>2σ <sub>1</sub> ) | 0.1335/0.3502                                                                           | 0.0700/0.1584                                                                                                                  | 0.1784/0.3250                                                                                                                  |
| R <sub>1</sub> /wR <sub>2</sub> (all data)                 | 0.1451/0.3668                                                                           | 0.0814/0.1651                                                                                                                  | 0.2073/0.3400                                                                                                                  |
| Weighting scheme                                           | w=1/(σ <sub>2</sub> (Fo <sup>2</sup> )+(0.2000 *P) <sup>2</sup> +0.00 *P), where P=(Max | w=1/(σ <sub>2</sub> (Fo <sup>2</sup> )+(0.0643 *P) <sup>2</sup> +4.19 *P), where P=(Max(Fo <sup>2</sup> ,0)+2 *Fc <sup>2</sup> | w=1/(σ <sub>2</sub> (Fo <sup>2</sup> )+(0.0757 *P) <sup>2</sup> +1.15 *P), where P=(Max(Fo <sup>2</sup> ,0)+2 *Fc <sup>2</sup> |

---

|                                                     |                                        |                     |                     |
|-----------------------------------------------------|----------------------------------------|---------------------|---------------------|
| Largest diff. peak and hole ( $e.\text{\AA}^{-3}$ ) | $(F_o^2,0)+2*F_c^2)/3$<br>0.380/-1.017 | )/3<br>0.504/-0.357 | )/3<br>0.180/-0.264 |
|-----------------------------------------------------|----------------------------------------|---------------------|---------------------|

---

**Table S2.** The shortest contacts in the structure of phase II of 1,4-dioxane at 0.42 GPa/296 K.

---

|                                | C4H8O2   |
|--------------------------------|----------|
| p (GPa)/T (K)                  | 0.42/296 |
| O $\cdots$ Hi ( $\text{\AA}$ ) | 2.655    |
| O $\cdots$ Hii                 | 2.672    |
| C-O $\cdots$ Hi ( $^\circ$ )   | 88.35    |
| C-O $\cdots$ Hii               | 86.06    |

Symmetry codes: i: 0.5+x, 1.5-y, 0.5+z; ii: 1.5-x, 0.5+y, 0.5-z
